# Supplementary material for: Chiral aggregation hierarchy in high-pressure resolved 2-butanol and 2,3-butanediol
Source: Royal Society of Chemistry journal article supplement (doi:10.1039/c2ce25372k), 2012-01-01
Supplement: c2ce25372k.pdf [file c2ce25372k.pdf]

## Supporting Information: Chiral aggregation hierarchy in high-pressure resolved 2-butanol and 2,3-butanediol

Marcin Podsiadło, Ewa Patyk and Andrzej Katrusiak\*

*Faculty of Chemistry, Adam Mickiewicz University, Grunwaldzka 6, 60-780 Poznań, Poland*

\*E-mail: katran@amu.edu.pl

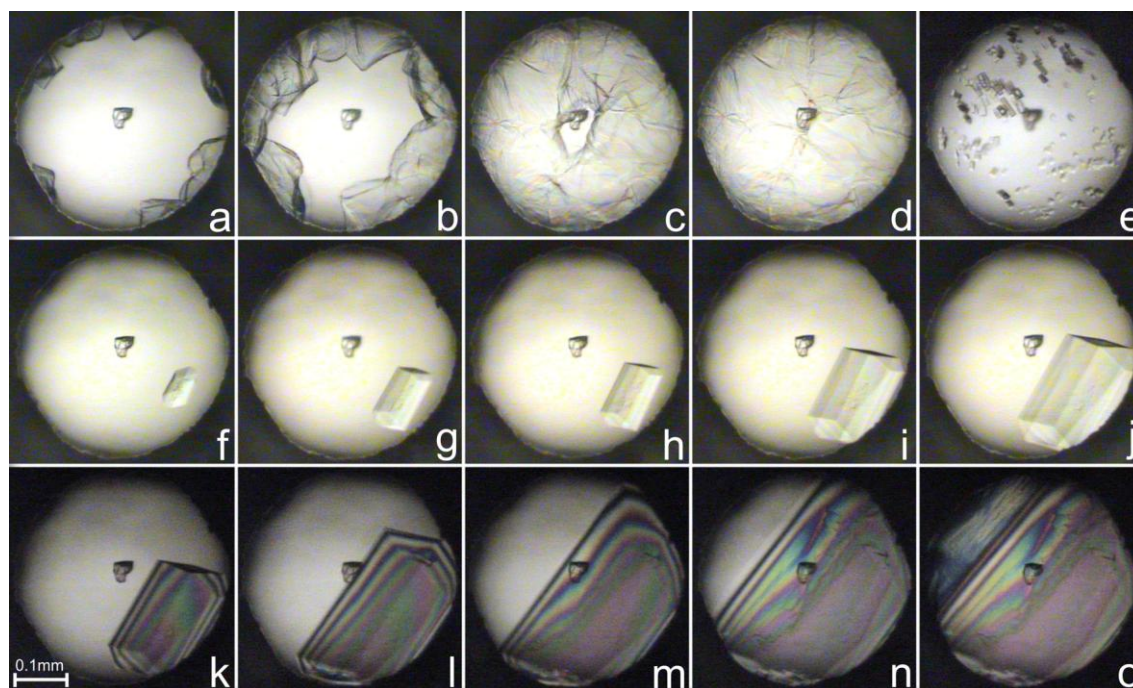

**Figure S1.** ( $\pm$ )-2-Butanol inside the DAC chamber: (a-d) isothermal freezing into polycrystalline mass at 295 K; (e) most of crystal grains melted at 360 K; (f) one crystal seed at 360 K and (g-n) its isochoric growth when cooled to 320 K; (o) the chamber nearly completely filled by the single-crystal at 295 K and 2.14 GPa. The ruby chip for pressure calibration lies at the central part of the DAC chamber. Photographs a-e and k-o were made in partly polarized light. The whole crystallization took 5 h.

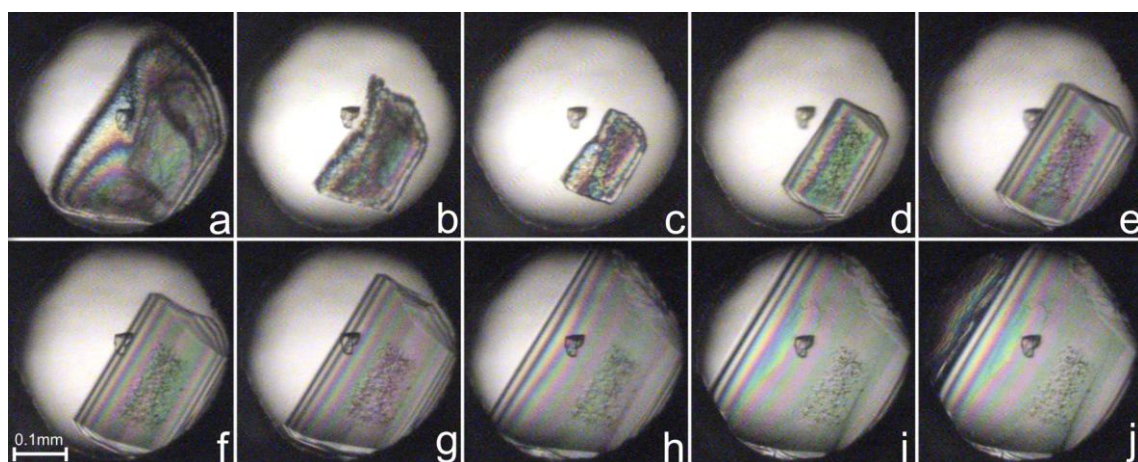

**Figure S2.** Isochoric 2-butanol single-crystal growth inside the DAC chamber (polarized-light mode): (a) one crystal seed at 450 K; (b) 480 K; (c) *ca.* 500 K after reducing the chamber volume; (d-i) the growing crystal on lowering temperature; (j) one crystal filling the whole DAC chamber at 2.33 GPa/295 K. The ruby chip is located as in Figure S1.

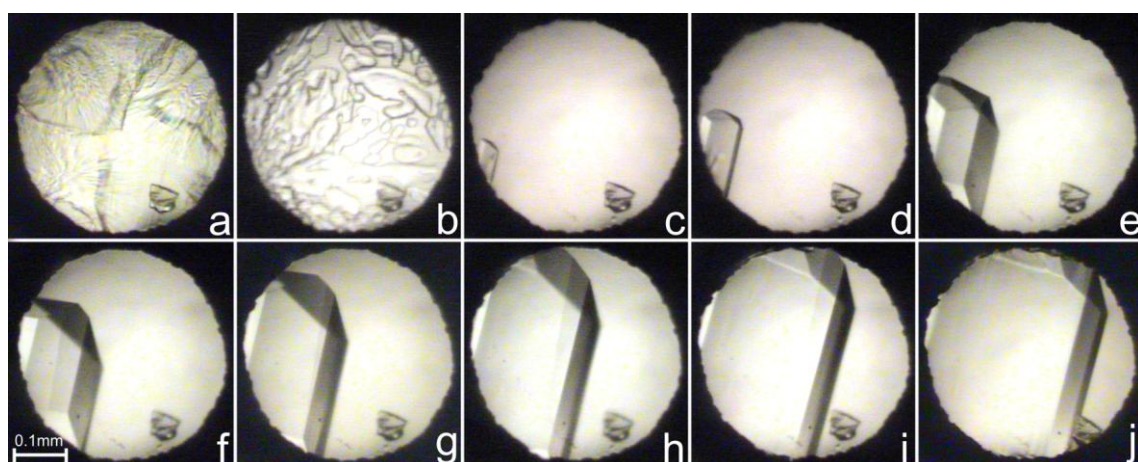

**Figure S3.** Stages of the 2,3-butanediol crystal growth inside the DAC chamber: (a) polycrystal grown isothermally at 295 K; (b) polycrystal-liquid equilibrium at 340 K; (c) one crystal seed at 350 K; (d-i) its growth on cooling to 300 K; and (j) the sample nearly filling the DAC chamber at 295 K and 0.43 GPa. The ruby chip for pressure calibration lies in the bottom part of the DAC chamber.

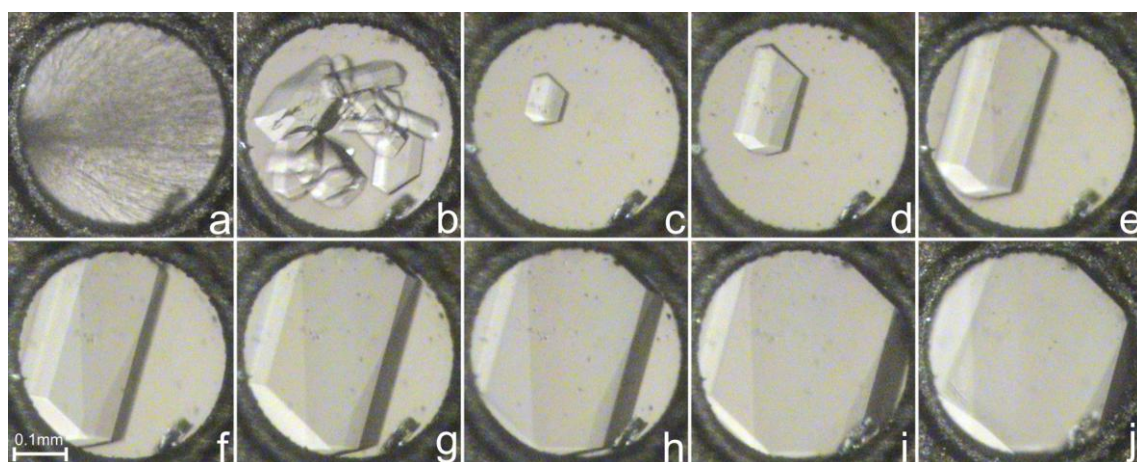

**Figure S4.** Stages of the 2,3-butanediol single-crystal growth inside the DAC chamber: (a) polycrystal grown isothermally at 295 K; (b) polycrystal-liquid equilibrium at 480 K; (c) one crystal seed at 500 K; (d-i) the single-crystal cooled to 410 K and (j) nearly filling the DAC chamber at 380 K and 0.72 GPa. The ruby chip for pressure calibration lies in the bottom part of the DAC chamber.

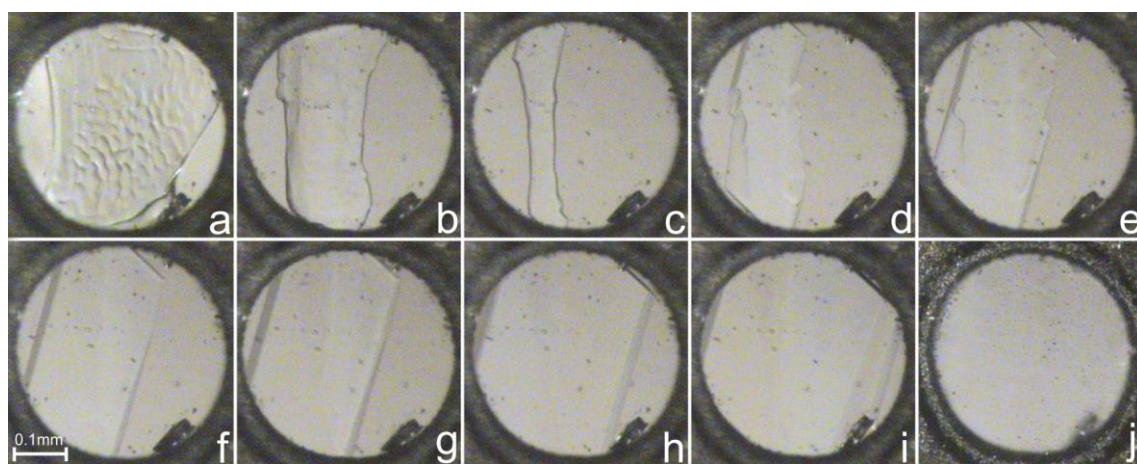

**Figure S5.** Isochoric 2,3-butanediol single-crystal growth inside the DAC chamber: (a) one crystal at 450 K; (b) 480 K; (c) *ca.* 530 K after reducing the chamber volume; (d-i) the growing crystal on lowering temperature; (j) one crystal filling the whole DAC chamber at 0.97 GPa/295 K. The ruby chip is located as in Figure S4.

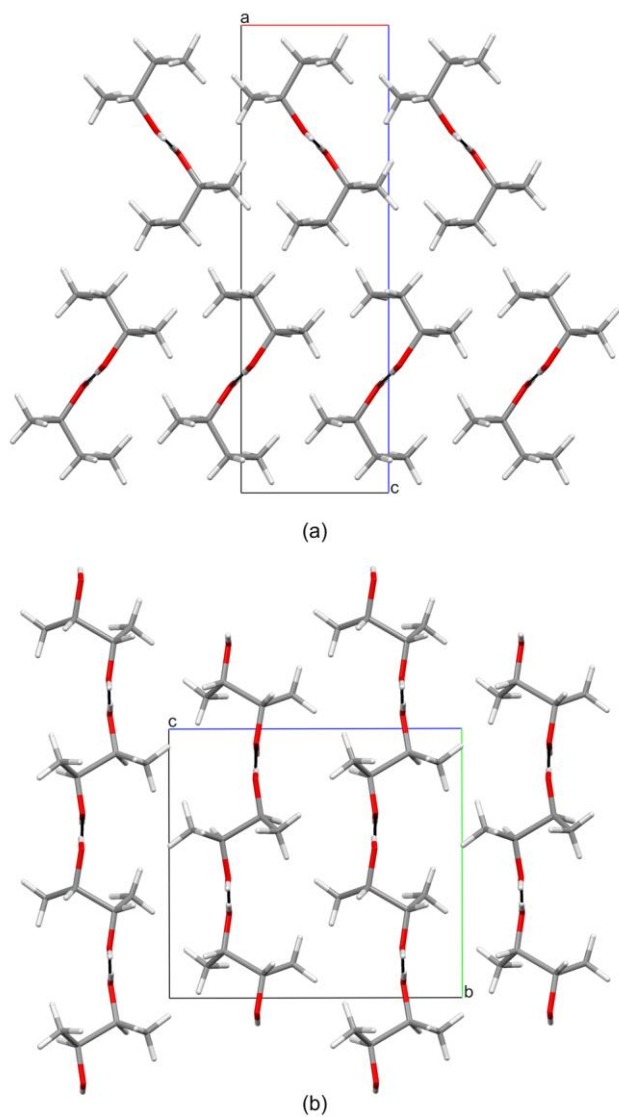

**Figure S6.** The crystal structure of: (a) 2-butanol at 2.14 GPa and (b) 2,3-butanediol at 0.43 GPa viewed along the O–H···O bonded aggregates.

**Table S1.** Crystal data and details of the refinements of 2-butanol at 2.14(5) and 2.33(5) GPa, and of 2,3-butanediol at 0.43(5), 0.63(5), 0.72(5) and 0.97(5) GPa (all at 295 K).

|                                                                   | <b>C<sub>4</sub>H<sub>10</sub>O</b>                   | <b>C<sub>4</sub>H<sub>10</sub>O</b>                   | <b>C<sub>4</sub>H<sub>10</sub>O<sub>2</sub></b>       | <b>C<sub>4</sub>H<sub>10</sub>O<sub>2</sub></b>       | <b>C<sub>4</sub>H<sub>10</sub>O<sub>2</sub></b>       | <b>C<sub>4</sub>H<sub>10</sub>O<sub>2</sub></b>       |
|-------------------------------------------------------------------|-------------------------------------------------------|-------------------------------------------------------|-------------------------------------------------------|-------------------------------------------------------|-------------------------------------------------------|-------------------------------------------------------|
| Temperature (K)                                                   | 295(2)                                                | 295(2)                                                | 295(2)                                                | 295(2)                                                | 295(2)                                                | 295(2)                                                |
| Pressure (GPa)                                                    | 2.14(5)                                               | 2.33(5)                                               | 0.43(5)                                               | 0.63(5)                                               | 0.72(5)                                               | 0.97(5)                                               |
| Formula weight                                                    | 74.12                                                 | 74.12                                                 | 90.12                                                 | 90.12                                                 | 90.12                                                 | 90.12                                                 |
| Crystal colour                                                    | colourless                                            | colourless                                            | colourless                                            | colourless                                            | colourless                                            | colourless                                            |
| Crystal size (mm)                                                 | 0.46x0.46x0.22                                        | 0.46x0.46x0.21                                        | 0.42x0.42x0.22                                        | 0.41x0.41x0.21                                        | 0.41x0.41x0.27                                        | 0.39x0.39x0.25                                        |
| Crystal system                                                    | orthorhombic                                          | orthorhombic                                          | orthorhombic                                          | orthorhombic                                          | orthorhombic                                          | orthorhombic                                          |
| Space group                                                       | <i>P</i> 2 <sub>1</sub> 2 <sub>1</sub> 2 <sub>1</sub> |
| Unit cell                                                         |                                                       |                                                       |                                                       |                                                       |                                                       |                                                       |
| <i>a</i> (Å)                                                      | 5.0580(10)                                            | 5.0122(10)                                            | 5.0482(10)                                            | 5.0292(10)                                            | 4.9973(10)                                            | 4.9467(10)                                            |
| <i>b</i> (Å)                                                      | 5.2221(10)                                            | 5.0885(10)                                            | 9.4220(19)                                            | 9.3989(19)                                            | 9.4478(19)                                            | 9.3791(19)                                            |
| <i>c</i> (Å)                                                      | 16.054(3)                                             | 16.044(3)                                             | 10.250(2)                                             | 10.186(2)                                             | 10.076(2)                                             | 9.834(2)                                              |
| Volume (Å <sup>3</sup> )                                          | 424.04(14)                                            | 409.20(14)                                            | 487.56(17)                                            | 481.46(17)                                            | 475.72(16)                                            | 456.25(16)                                            |
| <i>Z</i>                                                          | 4                                                     | 4                                                     | 4                                                     | 4                                                     | 4                                                     | 4                                                     |
| <i>D<sub>x</sub></i> (g cm <sup>-3</sup> )                        | 1.161                                                 | 1.203                                                 | 1.228                                                 | 1.243                                                 | 1.258                                                 | 1.312                                                 |
| Wavelength                                                        | 0.71073                                               | 0.71073                                               | 0.71073                                               | 0.71073                                               | 0.71073                                               | 0.71073                                               |
| MoKα; λ (Å)                                                       |                                                       |                                                       |                                                       |                                                       |                                                       |                                                       |
| Absorption coefficient (mm <sup>-1</sup> )                        | 0.08                                                  | 0.08                                                  | 0.10                                                  | 0.10                                                  | 0.10                                                  | 0.10                                                  |
| <i>F</i> (000) (e)                                                | 168                                                   | 168                                                   | 200                                                   | 200                                                   | 200                                                   | 200                                                   |
| 2θ max (°)                                                        | 49.88                                                 | 49.84                                                 | 49.96                                                 | 49.92                                                 | 50.00                                                 | 56.24                                                 |
| min./max. indices <i>h,k,l</i>                                    | -5/5, -6/6, -17/16                                    | -4/4, -6/6, -15/15                                    | -6/6, -6/6, -12/12                                    | -5/5, -5/5, -11/11                                    | -5/5, -10/10, -4/4                                    | -6/6, -11/12, -3/3                                    |
| Reflections collected/unique                                      | 3268/565                                              | 2975/408                                              | 3678/467                                              | 3408/432                                              | 1832/318                                              | 1954/284                                              |
| <i>R</i> <sub>int</sub>                                           | 0.1303                                                | 0.1644                                                | 0.0642                                                | 0.1126                                                | 0.0321                                                | 0.0413                                                |
| Observed reflections ( <i>I</i> >4σ( <i>I</i> ))                  | 320                                                   | 304                                                   | 369                                                   | 315                                                   | 310                                                   | 268                                                   |
| Data/parameters                                                   | 565/46                                                | 408/46                                                | 467/55                                                | 432/55                                                | 318/55                                                | 284/25                                                |
| Goodness of fit on <i>F</i> <sup>2</sup>                          | 1.025                                                 | 1.101                                                 | 1.126                                                 | 1.157                                                 | 1.090                                                 | 1.126                                                 |
| Final <i>R</i> <sub>1</sub> indices ( <i>I</i> >4σ( <i>I</i> ))   | 0.0805                                                | 0.1118                                                | 0.0489                                                | 0.1013                                                | 0.0369                                                | 0.0451                                                |
| <i>R</i> <sub>1</sub> / <i>wR</i> <sub>2</sub> indices (all data) | 0.1265/0.2255                                         | 0.1301/0.3005                                         | 0.0619/0.1333                                         | 0.1224/0.3079                                         | 0.0375/0.0935                                         | 0.0481/0.1045                                         |
| Δσ <sub>max</sub> , Δσ <sub>min</sub> (eÅ <sup>-3</sup> )         | 0.24, -0.16                                           | 0.32, -0.39                                           | 0.16, -0.16                                           | 0.42, -0.36                                           | 0.10, -0.09                                           | 0.09, -0.10                                           |
| Weighting scheme <i>x; y</i> <sup>a</sup>                         | 0.1091; 0                                             | 0.1937; 0.11                                          | 0.0603; 0.18                                          | 0.1970; 0.23                                          | 0.0525; 0.19                                          | 0.0437; 0.32                                          |
| Absorption corrections                                            | DAC, gasket and sample crystal                        |
| DAC transmission min/max                                          | 0.63 / 0.90                                           | 0.64 / 0.92                                           | 0.63 / 0.92                                           | 0.63 / 0.92                                           | 0.91 / 1.00                                           | 0.91 / 1.00                                           |
| Gasket shadowing min/max                                          | 0.59 / 0.95                                           | 0.65 / 0.97                                           | 0.56 / 0.96                                           | 0.56 / 0.96                                           | 0.62 / 0.93                                           | 0.61 / 0.95                                           |
| Sample transmission min/max                                       | 0.98 / 0.98                                           | 0.98 / 0.98                                           | 0.97 / 0.98                                           | 0.97 / 0.98                                           | 0.97 / 0.97                                           | 0.97 / 0.98                                           |

<sup>a</sup>  $w = 1/(\sigma^2(F_o^2) + x^2P^2 + yP)$ , where  $P = (\text{Max}(F_o^2, 0) + 2Fc^2)/3$ .

**Table S2.** Atomic coordinates ( $\cdot 10^4$ ),  $U_{eq}$  and  $U_{iso}$  ( $\text{\AA}^2 \cdot 10^3$ ) for 2-butanol at 2.14 and 2.33 GPa.

| Atom                  | $x/a$     | $y/b$    | $z/c$   | $U_{eq}/U_{iso}$ |
|-----------------------|-----------|----------|---------|------------------|
| <b>2.14 GPa/295 K</b> |           |          |         |                  |
| O1                    | 740(11)   | 3513(7)  | 7734(3) | 75(2)            |
| H1                    | 252       | 4930     | 7576    | 112              |
| C1                    | -1157(19) | 6174(10) | 9240(5) | 83(3)            |
| H11                   | -2057     | 6184     | 9767    | 124              |
| H12                   | -2424     | 5980     | 8800    | 124              |
| H13                   | -220      | 7758     | 9170    | 124              |
| C2                    | 859(18)   | 3877(11) | 9216(5) | 73(2)            |
| H21                   | 2119      | 4064     | 9667    | 88               |
| H22                   | -89       | 2284     | 9299    | 88               |
| C3                    | 2249(16)  | 3769(9)  | 8443(5) | 54(2)            |
| H31                   | 3269      | 5357     | 8390    | 65               |
| C4                    | 4239(15)  | 1515(10) | 8452(4) | 57(2)            |
| H41                   | 5167      | 1460     | 7931    | 86               |
| H42                   | 3302      | -64      | 8532    | 86               |
| H43                   | 5480      | 1753     | 8897    | 86               |
| <b>2.33 GPa/295 K</b> |           |          |         |                  |
| O1                    | 644(16)   | 3215(10) | 7751(4) | 68(3)            |
| H1                    | 102       | 4629     | 7574    | 102              |
| C1                    | -1118(21) | 6155(12) | 9256(6) | 60(3)            |
| H11                   | -2020     | 6166     | 9784    | 90               |
| H12                   | -2400     | 5941     | 8817    | 90               |
| H13                   | -186      | 7786     | 9182    | 90               |
| C2                    | 884(22)   | 3870(12) | 9233(6) | 57(3)            |
| H21                   | 2155      | 4093     | 9683    | 68               |
| H22                   | -68       | 2239     | 9330    | 68               |
| C3                    | 2394(19)  | 3651(13) | 8422(5) | 46(3)            |
| H31                   | 3432      | 5254     | 8325    | 55               |
| C4                    | 4241(18)  | 1284(13) | 8453(5) | 46(2)            |
| H41                   | 5216      | 1161     | 7940    | 69               |
| H42                   | 3205      | -284     | 8532    | 69               |
| H43                   | 5468      | 1480     | 8909    | 69               |

**Table S3.** Atomic coordinates ( $\cdot 10^4$ ),  $U_{eq}$  and  $U_{iso}$  ( $\text{\AA}^2 \cdot 10^3$ ) for 2,3-butanediol at 0.43, 0.63, 0.72 and 0.97 GPa.

| Atom                  | $x/a$    | $y/b$    | $z/c$   | $U_{eq}/U_{iso}$ |
|-----------------------|----------|----------|---------|------------------|
| <b>0.43 GPa/295 K</b> |          |          |         |                  |
| O1                    | 3033(7)  | -537(8)  | 2016(3) | 73(3)            |
| H1                    | 1592     | -938     | 1991    | 109              |
| O2                    | 1930(7)  | 3132(8)  | 2953(3) | 58(3)            |
| H2                    | 3432     | 3463     | 2972    | 70               |
| C1                    | 637(9)   | 1267(10) | 789(4)  | 56(2)            |
| H11                   | 849      | 667      | 40      | 84               |
| H12                   | 856      | 2241     | 536     | 84               |
| H13                   | -1101    | 1135     | 1149    | 84               |
| C2                    | 2691(9)  | 888(11)  | 1800(4) | 39(2)            |
| H21                   | 4388     | 1252     | 1479    | 47               |
| C3                    | 2038(10) | 1743(11) | 3141(5) | 46(2)            |
| H31                   | 3453     | 1545     | 3769    | 55               |
| C4                    | -560(9)  | 1195(9)  | 3704(5) | 56(2)            |
| H41                   | -1089    | 1785     | 4421    | 84               |
| H42                   | -324     | 238      | 4004    | 84               |
| H43                   | -1904    | 1215     | 3042    | 84               |

| <b>0.63 GPa/295 K</b> |          |          |         |       |
|-----------------------|----------|----------|---------|-------|
| O1                    | 3021(14) | -553(14) | 2008(5) | 50(2) |
| H1                    | 1565     | -944     | 1982    | 75    |
| O2                    | 1908(13) | 3147(14) | 2968(6) | 42(2) |
| H2                    | 3404     | 3492     | 2985    | 50    |
| C1                    | 627(19)  | 1298(20) | 762(9)  | 51(3) |
| H11                   | 822      | 703      | 3       | 77    |
| H12                   | 901      | 2274     | 517     | 77    |
| H13                   | -1129    | 1187     | 1117    | 77    |
| C2                    | 2711(15) | 864(18)  | 1812(6) | 25(2) |
| H21                   | 4428     | 1215     | 1493    | 30    |
| C3                    | 2070(18) | 1751(21) | 3120(7) | 31(3) |
| H31                   | 3494     | 1560     | 3752    | 38    |
| C4                    | -574(18) | 1148(19) | 3707(9) | 48(3) |
| H41                   | -1129    | 1733     | 4430    | 73    |
| H42                   | -287     | 193      | 4009    | 73    |
| H43                   | -1929    | 1150     | 3043    | 73    |

  

| <b>0.72 GPa/295 K</b> |         |         |         |       |
|-----------------------|---------|---------|---------|-------|
| O1                    | 3077(4) | -528(2) | 1991(5) | 45(2) |
| H1                    | 1626    | -933    | 1966    | 67    |
| O2                    | 1915(4) | 3159(2) | 2940(5) | 41(2) |
| H2                    | 3432    | 3488    | 2960    | 49    |
| C1                    | 669(7)  | 1246(4) | 674(9)  | 42(4) |
| H11                   | 993     | 607     | -50     | 63    |
| H12                   | 859     | 2204    | 370     | 63    |
| H13                   | -1113   | 1105    | 1005    | 63    |
| C2                    | 2687(5) | 961(3)  | 1783(8) | 33(4) |
| H21                   | 4407    | 1350    | 1490    | 40    |
| C3                    | 2033(6) | 1652(3) | 3145(8) | 31(4) |
| H31                   | 3491    | 1443    | 3765    | 37    |
| C4                    | -573(6) | 1204(3) | 3765(8) | 42(5) |
| H41                   | -1008   | 1834    | 4481    | 63    |
| H42                   | -406    | 257     | 4100    | 63    |
| H43                   | -1966   | 1235    | 3110    | 63    |

  

| <b>0.97 GPa/295 K</b> |         |         |          |       |
|-----------------------|---------|---------|----------|-------|
| O1                    | 3112(4) | -548(2) | 1948(8)  | 24(1) |
| H1                    | 1650    | -960    | 1923     | 36    |
| O2                    | 1896(5) | 3167(2) | 2944(7)  | 24(1) |
| H2                    | 3430    | 3497    | 2965     | 29    |
| C1                    | 641(8)  | 1241(4) | 631(13)  | 33(1) |
| H11                   | 951     | 597     | -112     | 49    |
| H12                   | 826     | 2205    | 319      | 49    |
| H13                   | -1150   | 1099    | 982      | 49    |
| C2                    | 2701(6) | 956(3)  | 1752(11) | 21(1) |
| H21                   | 4427    | 1359    | 1450     | 26    |
| C3                    | 2014(7) | 1645(3) | 3149(11) | 21(1) |
| H31                   | 3476    | 1431    | 3790     | 26    |
| C4                    | -650(7) | 1188(4) | 3774(12) | 31(1) |
| H41                   | -1110   | 1823    | 4503     | 46    |
| H42                   | -485    | 234     | 4119     | 46    |
| H43                   | -2042   | 1216    | 3094     | 46    |

**Table S4.** Dimensions of O–H···O hydrogen bonds in 2-butanol at 2.14 and 2.33 GPa/295 K; and in 2,3-butanediol at 0.43, 0.63, 0.72 and 0.97 GPa/295 K.

| D–H···A                        | H···A (Å) | D···A (Å) | D–H···A (°) | symmetry code       |
|--------------------------------|-----------|-----------|-------------|---------------------|
| 2-butanol: 2.14 GPa/295 K      |           |           |             |                     |
| O1–H1···O1                     | 2.000     | 2.818(4)  | 175.19      | $-x, 0.5+y, 1.5-z$  |
| 2.33 GPa/295 K                 |           |           |             |                     |
| O1–H1···O1                     | 1.934     | 2.745(4)  | 170.16      | $-x, 0.5+y, 1.5-z$  |
| 2,3-butanediol: 0.43 GPa/295 K |           |           |             |                     |
| O1–H1···O2                     | 1.983     | 2.802(6)  | 176.34      | $-x, -0.5+y, 0.5-z$ |
| O2–H2···O1                     | 2.018     | 2.835(6)  | 174.38      | $1-x, 0.5+y, 0.5-z$ |
| 0.63 GPa/295 K                 |           |           |             |                     |
| O1–H1···O2                     | 1.945     | 2.764(12) | 176.53      | $-x, -0.5+y, 0.5-z$ |
| O2–H2···O1                     | 2.009     | 2.828(11) | 176.65      | $1-x, 0.5+y, 0.5-z$ |
| 0.72 GPa/295 K                 |           |           |             |                     |
| O1–H1···O2                     | 1.969     | 2.786(3)  | 175.08      | $-x, -0.5+y, 0.5-z$ |
| O2–H2···O1                     | 1.977     | 2.795(3)  | 174.25      | $1-x, 0.5+y, 0.5-z$ |
| 0.97 GPa/295 K                 |           |           |             |                     |
| O1–H1···O2                     | 1.940     | 2.757(3)  | 173.66      | $-x, -0.5+y, 0.5-z$ |
| O2–H2···O1                     | 1.933     | 2.750(3)  | 174.51      | $1-x, 0.5+y, 0.5-z$ |



**Table S5.** Donohue angles (Donohue, J. (1952). *J. Phys. Chem.* **56**, 502-510.) of O–H⋯O hydrogen bonds in 2-butanol and 2,3-butanediol.

| C–O–H⋯O–C                      | C–O⋯O* (°) | O⋯O*–C* (°) | *symmetry code    |
|--------------------------------|------------|-------------|-------------------|
| 2-butanol: 2.14 GPa/295 K      |            |             |                   |
| C3–O1–H1⋯O1–C3                 | 106.1(3)   | 117.2(3)    | –x, 0.5+y, 1.5–z  |
| 2.33 GPa/295 K                 |            |             |                   |
| C3–O1–H1⋯O1–C3                 | 103.0(4)   | 121.2(5)    | –x, 0.5+y, 1.5–z  |
| 2,3-butanediol: 0.43 GPa/295 K |            |             |                   |
| C2–O1–H1⋯O2–C3                 | 109.1(3)   | 118.5(4)    | –x, –0.5+y, 0.5–z |
| C3–O2–H2⋯O1–C2                 | 113.5(4)   | 123.2(4)    | 1–x, 0.5+y, 0.5–z |
| 0.63 GPa/295 K                 |            |             |                   |
| C2–O1–H1⋯O2–C3                 | 109.4(6)   | 119.5(6)    | –x, –0.5+y, 0.5–z |
| C3–O2–H2⋯O1–C2                 | 111.8(6)   | 122.0(6)    | 1–x, 0.5+y, 0.5–z |
| 0.72 GPa/295 K                 |            |             |                   |
| C2–O1–H1⋯O2–C3                 | 108.6(2)   | 118.3(2)    | –x, –0.5+y, 0.5–z |
| C3–O2–H2⋯O1–C2                 | 113.5(2)   | 124.1(2)    | 1–x, 0.5+y, 0.5–z |
| 0.97 GPa/295 K                 |            |             |                   |
| C2–O1–H1⋯O2–C3                 | 107.9(2)   | 117.6(2)    | –x, –0.5+y, 0.5–z |
| C3–O2–H2⋯O1–C2                 | 113.1(2)   | 124.2(2)    | 1–x, 0.5+y, 0.5–z |
